# Supplementary material for: Fine-Scale Genetic Structure in Finland
Source: G3 (Bethesda). 2017 Aug 29;7(10):3459–68. doi: 10.1534/g3.117.300217 (PMC5633394; doi:10.1534/g3.117.300217)
Supplement: Supplementary file 1 [file 3459TableS1.xlsx]

## Sheet: Table S1 Fst Estimates
Supplemental Table 1. Ind1042 POP17 Hudson's Fst Estimates (Bhatia et al 2013, Eigensoft package)
	P1	P2	P3	P4	P5	P6	P7	P8	P9	P10	P11	P12	P13	P14	P15	P16	P17
P1	0	0.003	0.001	0.003	0.004	0	0.002	0.002	0.002	0.003	0.001	0.002	0.003	0.001	0.001	0.002	0.001
P2	0.003	0	0.003	0.006	0.002	0.002	0.001	0.002	0.002	0.002	0.004	0.004	0.001	0.004	0.004	0.002	0.004
P3	0.001	0.003	0	0.002	0.004	0.001	0.002	0.001	0.001	0.003	0.001	0.002	0.002	0.001	0.001	0.002	0.002
P4	0.003	0.006	0.002	0	0.006	0.003	0.004	0.004	0.003	0.005	0.002	0.002	0.005	0.001	0.003	0.004	0.002
P5	0.004	0.002	0.004	0.006	0	0.003	0.002	0.003	0.003	0.002	0.005	0.005	0.002	0.005	0.005	0.003	0.005
P6	0	0.002	0.001	0.003	0.003	0	0.001	0.002	0.002	0.002	0.001	0.002	0.002	0.001	0.001	0.001	0.001
P7	0.002	0.001	0.002	0.004	0.002	0.001	0	0.001	0.001	0.002	0.003	0.003	0.001	0.003	0.002	0.001	0.003
P8	0.002	0.002	0.001	0.004	0.003	0.002	0.001	0	0.001	0.002	0.003	0.003	0.002	0.002	0.002	0.003	0.003
P9	0.002	0.002	0.001	0.003	0.003	0.002	0.001	0.001	0	0.002	0.003	0.002	0.002	0.002	0.002	0.002	0.003
P10	0.003	0.002	0.003	0.005	0.002	0.002	0.002	0.002	0.002	0	0.004	0.004	0.002	0.004	0.004	0.003	0.004
P11	0.001	0.004	0.001	0.002	0.005	0.001	0.003	0.003	0.003	0.004	0	0.003	0.004	0.002	0.001	0.003	0.001
P12	0.002	0.004	0.002	0.002	0.005	0.002	0.003	0.003	0.002	0.004	0.003	0	0.004	0.002	0.003	0.004	0.002
P13	0.003	0.001	0.002	0.005	0.002	0.002	0.001	0.002	0.002	0.002	0.004	0.004	0	0.003	0.003	0.002	0.004
P14	0.001	0.004	0.001	0.001	0.005	0.001	0.003	0.002	0.002	0.004	0.002	0.002	0.003	0	0.002	0.003	0.002
P15	0.001	0.004	0.001	0.003	0.005	0.001	0.002	0.002	0.002	0.004	0.001	0.003	0.003	0.002	0	0.002	0.001
P16	0.002	0.002	0.002	0.004	0.003	0.001	0.001	0.003	0.002	0.003	0.003	0.004	0.002	0.003	0.002	0	0.003
P17	0.001	0.004	0.002	0.002	0.005	0.001	0.003	0.003	0.003	0.004	0.001	0.002	0.004	0.002	0.001	0.003	0

## Sheet: Table S2 Fst SEs
Supplemental Table 2. Ind1042 POP17 Hudson's Fst Standard Errors (Bhatia et al 2013, Eigensoft package)
	P1	P2	P3	P4	P5	P6	P7	P8	P9	P10	P11	P12	P13	P14	P15	P16	P17
P1	0	6.3e-05	6e-05	9.3e-05	0.000101	3.9e-05	6.3e-05	6.3e-05	7.6e-05	9.7e-05	5e-05	9.1e-05	8.1e-05	8.1e-05	5.5e-05	0.000111	6.3e-05
P2	6.3e-05	0	7.4e-05	0.000113	8.1e-05	5.5e-05	4.8e-05	5.5e-05	7.1e-05	9e-05	8.3e-05	0.000116	6.3e-05	9.7e-05	7.7e-05	0.00012	9.4e-05
P3	6e-05	7.4e-05	0	0.000106	0.000104	5.9e-05	7.3e-05	6.8e-05	8.2e-05	0.000105	7.2e-05	0.000102	8.8e-05	9.2e-05	7.3e-05	0.000127	8.2e-05
P4	9.3e-05	0.000113	0.000106	0	0.000143	0.0001	0.000118	0.000115	0.000119	0.000148	0.000101	0.000128	0.000131	0.000119	0.00011	0.000166	0.000111
P5	0.000101	8.1e-05	0.000104	0.000143	0	9.4e-05	8.4e-05	9.1e-05	0.000105	0.000113	0.000114	0.000143	9.5e-05	0.000134	0.000114	0.000141	0.000123
P6	3.9e-05	5.5e-05	5.9e-05	0.0001	9.4e-05	0	5.5e-05	5.6e-05	7.4e-05	9.1e-05	5.4e-05	9.1e-05	7.4e-05	8.1e-05	5.7e-05	0.000109	6.9e-05
P7	6.3e-05	4.8e-05	7.3e-05	0.000118	8.4e-05	5.5e-05	0	6.1e-05	7.7e-05	9.6e-05	7.4e-05	0.00011	7.4e-05	9.4e-05	7.6e-05	0.000115	8.6e-05
P8	6.3e-05	5.5e-05	6.8e-05	0.000115	9.1e-05	5.6e-05	6.1e-05	0	7.4e-05	9.2e-05	7.3e-05	0.000106	7.6e-05	9.2e-05	7.6e-05	0.000126	8.7e-05
P9	7.6e-05	7.1e-05	8.2e-05	0.000119	0.000105	7.4e-05	7.7e-05	7.4e-05	0	0.000113	8.7e-05	0.000117	8.7e-05	0.000108	9e-05	0.000137	0.000103
P10	9.7e-05	9e-05	0.000105	0.000148	0.000113	9.1e-05	9.6e-05	9.2e-05	0.000113	0	0.000109	0.000142	0.000107	0.000128	0.000112	0.000156	0.000119
P11	5e-05	8.3e-05	7.2e-05	0.000101	0.000114	5.4e-05	7.4e-05	7.3e-05	8.7e-05	0.000109	0	0.000105	9.2e-05	9.2e-05	6.1e-05	0.000126	7e-05
P12	9.1e-05	0.000116	0.000102	0.000128	0.000143	9.1e-05	0.00011	0.000106	0.000117	0.000142	0.000105	0	0.000119	0.000121	0.000107	0.000158	0.000115
P13	8.1e-05	6.3e-05	8.8e-05	0.000131	9.5e-05	7.4e-05	7.4e-05	7.6e-05	8.7e-05	0.000107	9.2e-05	0.000119	0	0.000112	9.7e-05	0.000131	0.000102
P14	8.1e-05	9.7e-05	9.2e-05	0.000119	0.000134	8.1e-05	9.4e-05	9.2e-05	0.000108	0.000128	9.2e-05	0.000121	0.000112	0	9.8e-05	0.000144	0.000107
P15	5.5e-05	7.7e-05	7.3e-05	0.00011	0.000114	5.7e-05	7.6e-05	7.6e-05	9e-05	0.000112	6.1e-05	0.000107	9.7e-05	9.8e-05	0	0.000121	7.7e-05
P16	0.000111	0.00012	0.000127	0.000166	0.000141	0.000109	0.000115	0.000126	0.000137	0.000156	0.000126	0.000158	0.000131	0.000144	0.000121	0	0.000141
P17	6.3e-05	9.4e-05	8.2e-05	0.000111	0.000123	6.9e-05	8.6e-05	8.7e-05	0.000103	0.000119	7e-05	0.000115	0.000102	0.000107	7.7e-05	0.000141	0
